# Supplementary material
Source: PubMed Central journal article supplement (PMC5563137)
Supplement: PRO-26-1864-s002.pdf [file PRO-26-1864-s002.pdf]

# Supplementary Figures

## **Usage of a dataset of NMR resolved protein structures to test aggregation vs. solubility prediction algorithms**

Daniel B. Roche<sup>1,2</sup>, Etienne Villain<sup>1,2</sup> and Andrey V. Kajava<sup>1,2,\*</sup>

<sup>1</sup>Centre de Recherche en Biologie cellulaire de Montpellier, CNRS-UMR 5237, Montpellier, France

<sup>2</sup>Institut de Biologie Computationnelle, Université de Montpellier, Montpellier France

\*Corresponding author: Andrey V. Kajava email: [andrey.kajava@crbm.cnrs.fr](mailto:andrey.kajava@crbm.cnrs.fr)

## Analysis of Sequences from NMR-based set of soluble tails

### Global statistics

Number of sequences: 361  
Total number of residues: 10078  
Smallest sequence: 15 residues  
Largest: 108 residues  
Average sequence length: 27.9 residues

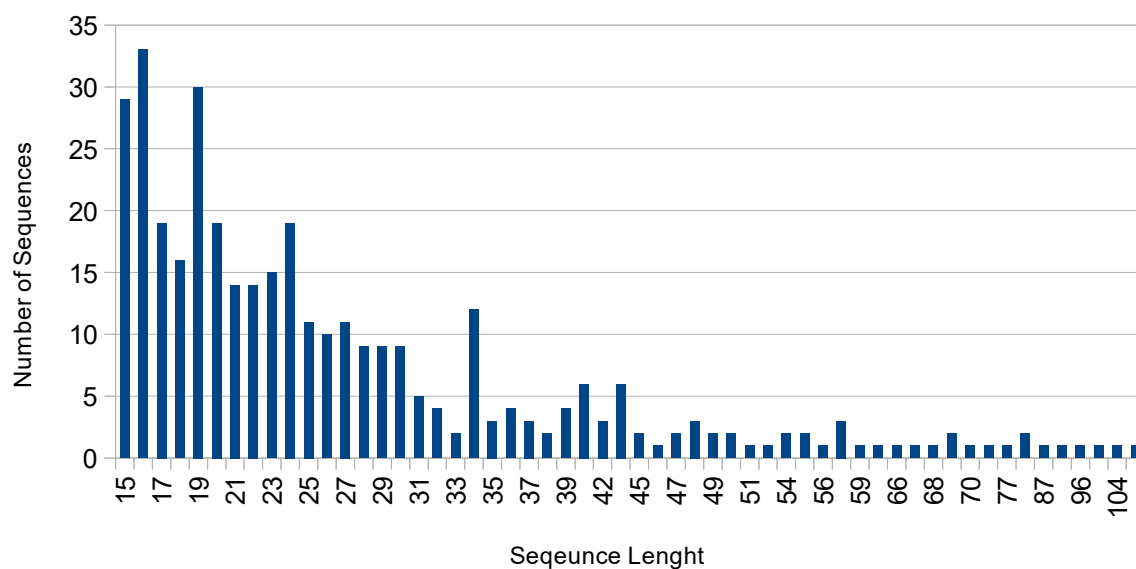

**Figure S1:** Sequence length distribution for our database.

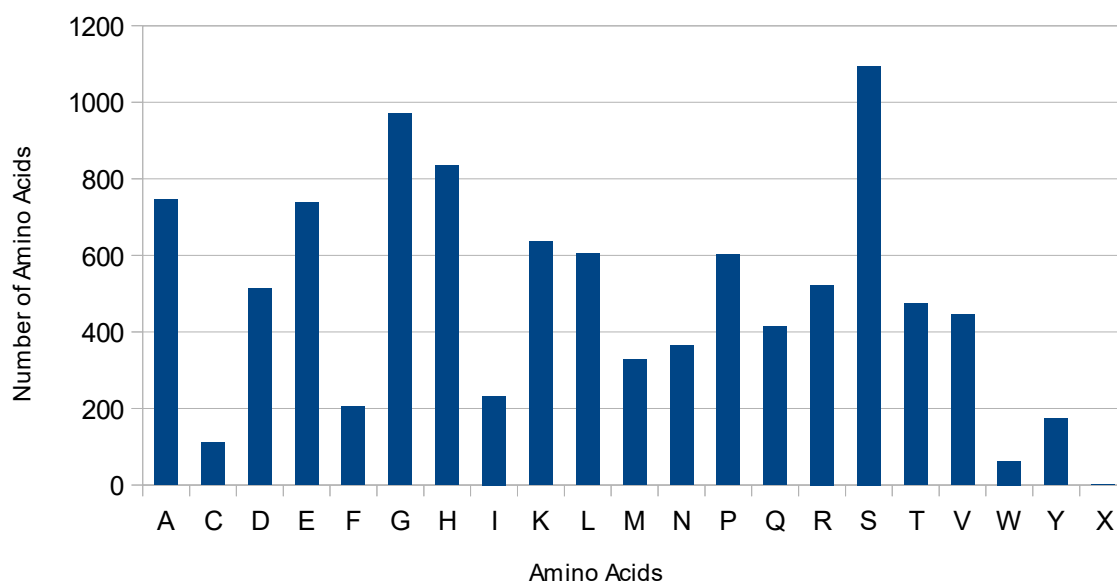

**Figure S2:** Amino acids composition for all the sequences contained in our database.

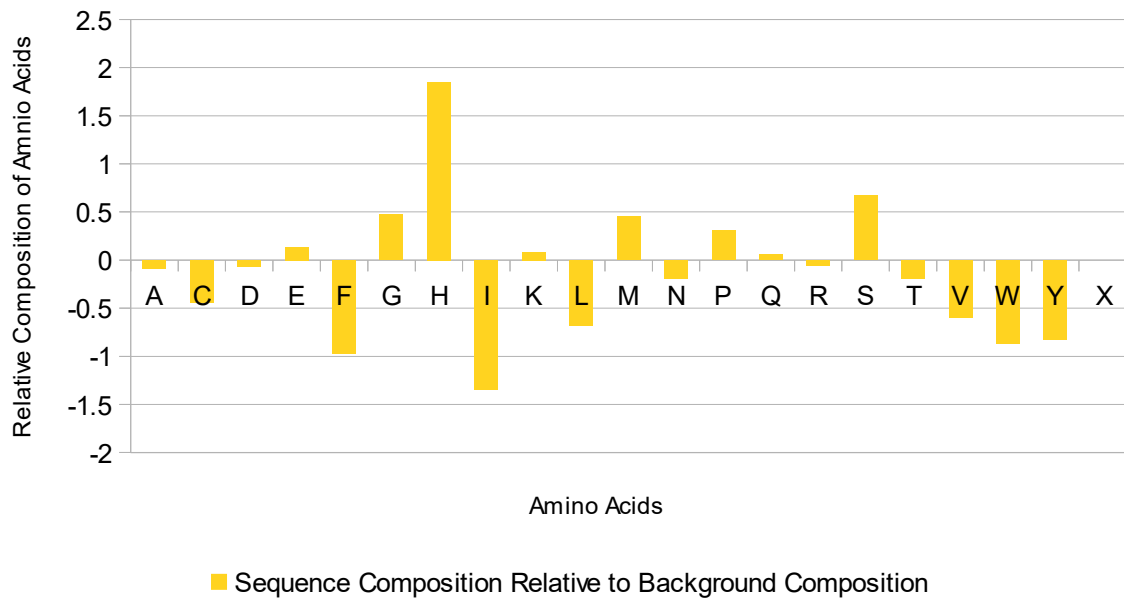

**Figure S3:** Relative amino acids composition for all the sequences contained in our database relative to background composition, generated using esl-seqstat from HMMER (1,2).

1. Eddy SR. Profile Hidden Markov Models. *Bioinformatics*, 14:755-763, 1998.
2. Mistry J, Finn RD, Eddy SR, Bateman A, Punta M. Challenges in Homology Search: HMMER3 and Convergent Evolution of Coiled-Coil Regions. *Nucleic Acids Research*, 41:e121, 2013.
